# Supplementary material
Source: PubMed Central journal article supplement (PMC2763928)
Supplement: NIHMS140494-supplement-1_si_001.pdf [file NIHMS140494-supplement-1_si_001.pdf]

SUPPLEMENTAL INFORMATION  
for  
**Disruption of the arsenic (+3 oxidation state)  
methyltransferase gene in the mouse alters the phenotype  
for methylation of arsenic and affects distribution and  
retention of orally administered arsenate**

Zuzana Drobna<sup>1</sup>, Hua Narenmandura<sup>2</sup>, Kevin M. Kubachka<sup>3</sup>, Brenda C. Edwards<sup>4</sup>, Karen Herbin-Davis<sup>4</sup>, Miroslav Styblo<sup>1</sup>, X. Chris Le<sup>2</sup>, John T. Creed<sup>3</sup>, Noboyu Maeda<sup>5</sup>, Michael F. Hughes<sup>4</sup>, David J. Thomas<sup>4</sup>

1. Department of Nutrition, University of North Carolina at Chapel Hill, Chapel Hill, North Carolina, 27599 USA;
2. Analytical and Environmental Toxicology, Department of Laboratory Medicine and Pathology, Faculty of Medicine and Dentistry, University of Alberta, Edmonton, Alberta, T6G 2G3 Canada;
3. Microbiological and Chemical Exposure Branch, Assessment Research Division, National Exposure Research Laboratory, Office of Research and Development, U.S. Environmental Protection Agency, Cincinnati, Ohio 45268 USA;
4. Pharmacokinetics Branch, Experimental Toxicology Division, National Health and Environmental Effects Research Laboratory, Office of Research and Development, U.S. Environmental Protection Agency, Research Triangle Park North Carolina 27711 USA;
5. Department of Pathology and Laboratory Medicine, University of North Carolina, Chapel Hill, North Carolina 27599 USA

One supplemental figure is included:

**Figure SI-1**

**Figure SI-1:**

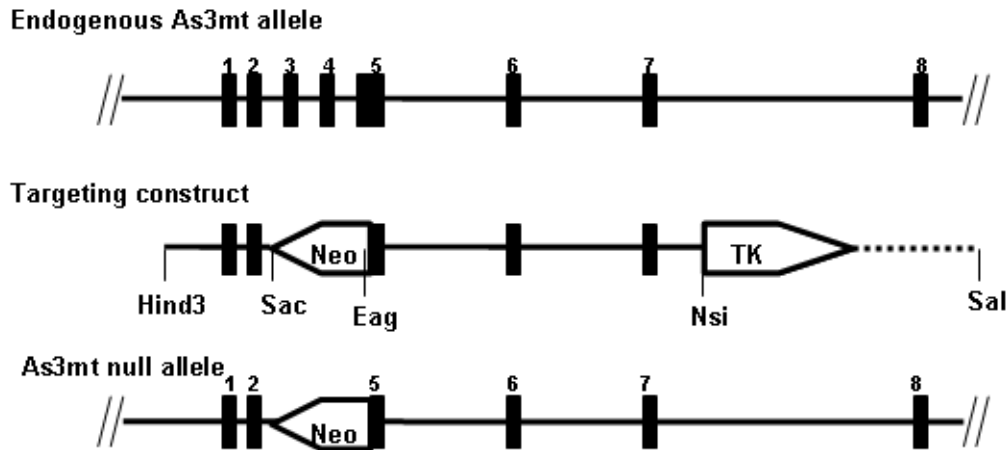

### **Targeted disruption of the mouse *As3mt* gene**

- (A) Endogenous *As3mt* - Exons 1-8 are shown by boxes and numbered.
- (B) Targeting construct - Neo gene (NEO) replacing exons 3 and 4 is in the opposite orientation as the *As3mt* gene. Thymidine kinase (TK) gene is in the same orientation as the *As3mt* gene. Broken line indicates vector sequence. A 1.2 kb *Hind3/Sac1* fragment and a 6.6 kb *Eag1/Nsi1* fragment were used as the two arms of homology.
- (C) Targeted locus depicted after a homologous crossover.
